# Supplementary material for: Cytotoxicity of Cyclodipeptides fromPseudomonas aeruginosaPAO1 Leads to Apoptosis in Human Cancer Cell Lines
Source: Hindawi journal article supplement (doi:10.1155/2015/197608), 2015-01-01
Supplement: f1 [file 197608.f1.pdf]

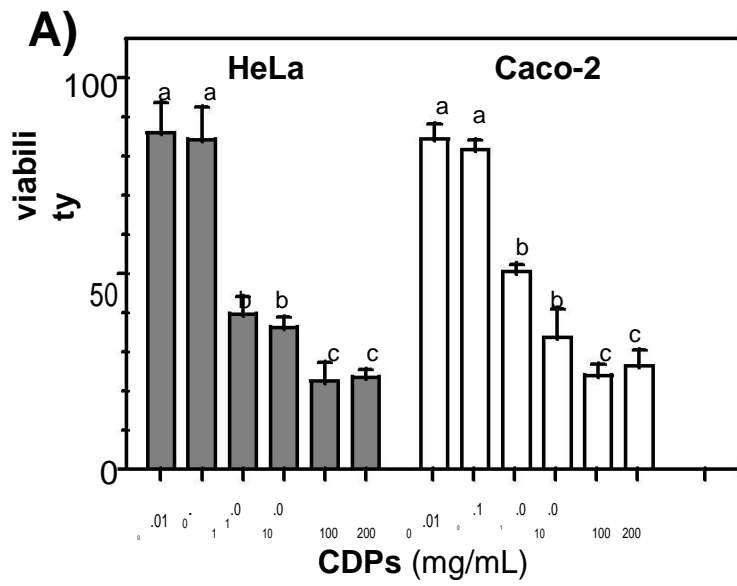

1

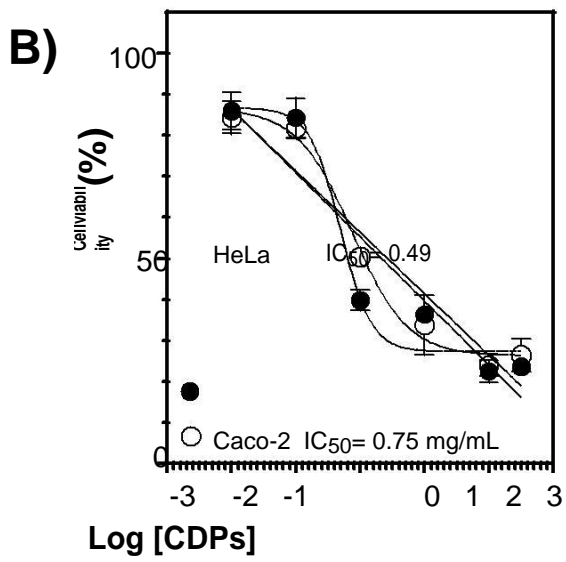

Figure S1 (supplementary material).
